# Supplementary material
Source: PubMed Central journal article supplement (PMC1236562)

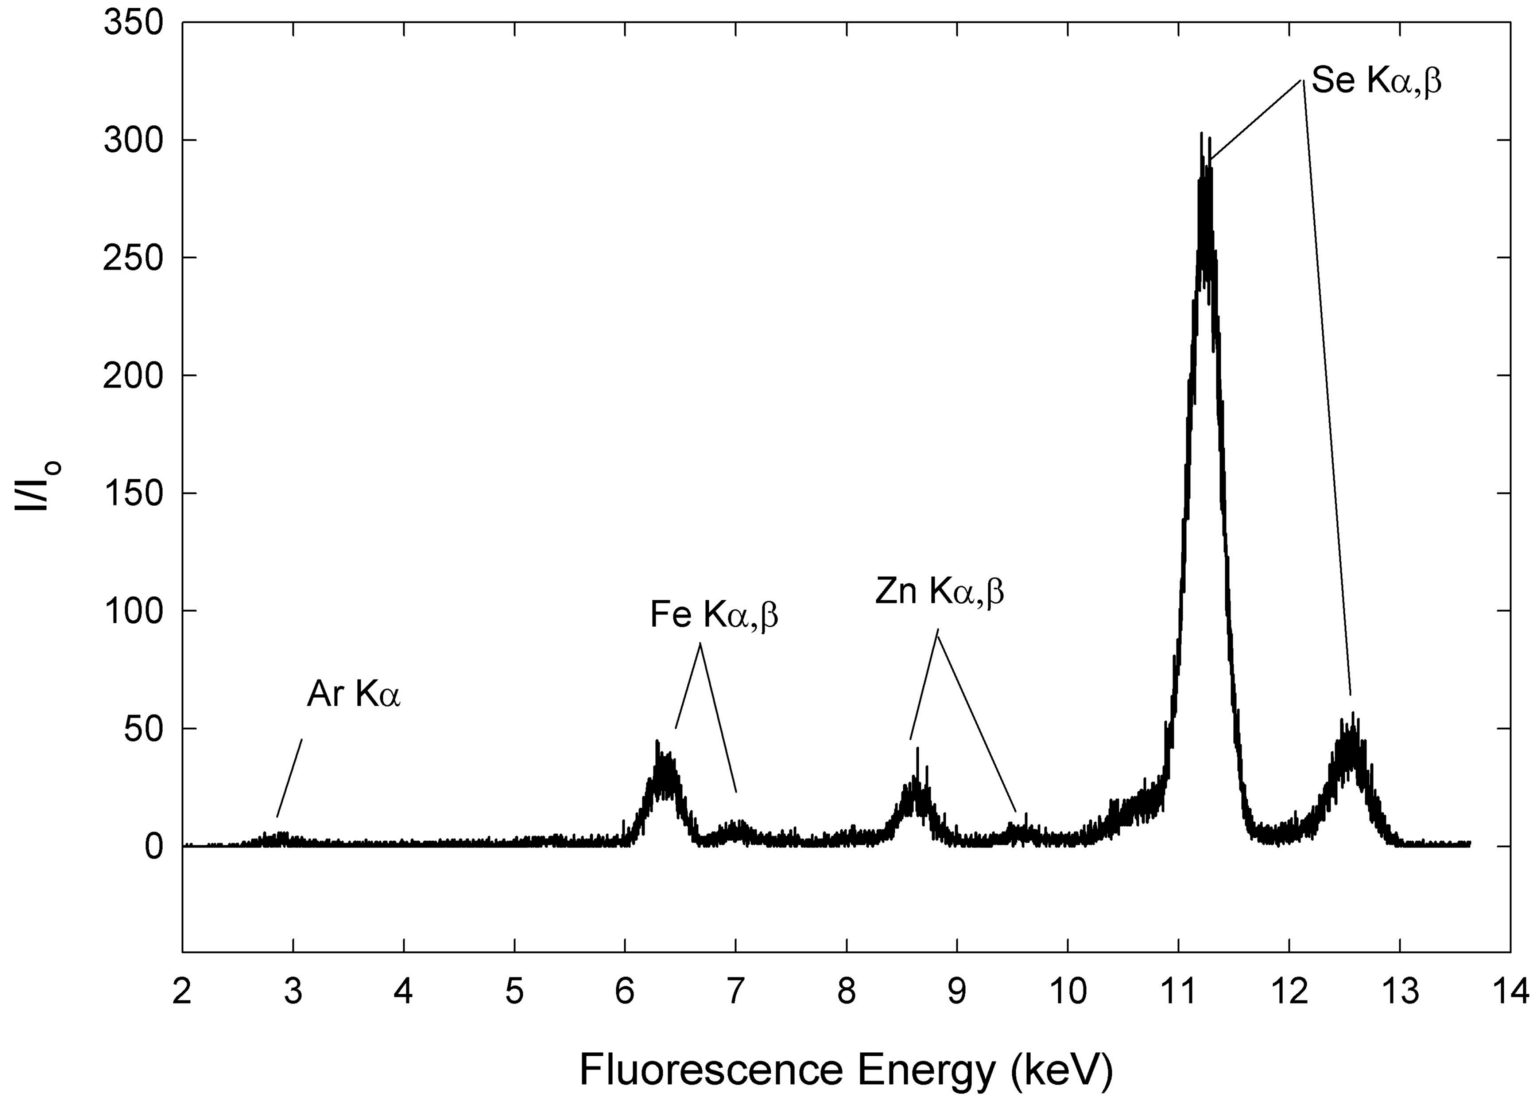

Supplement: pnas_0505726102_1.pdf [file pnas_0505726102_1.pdf]

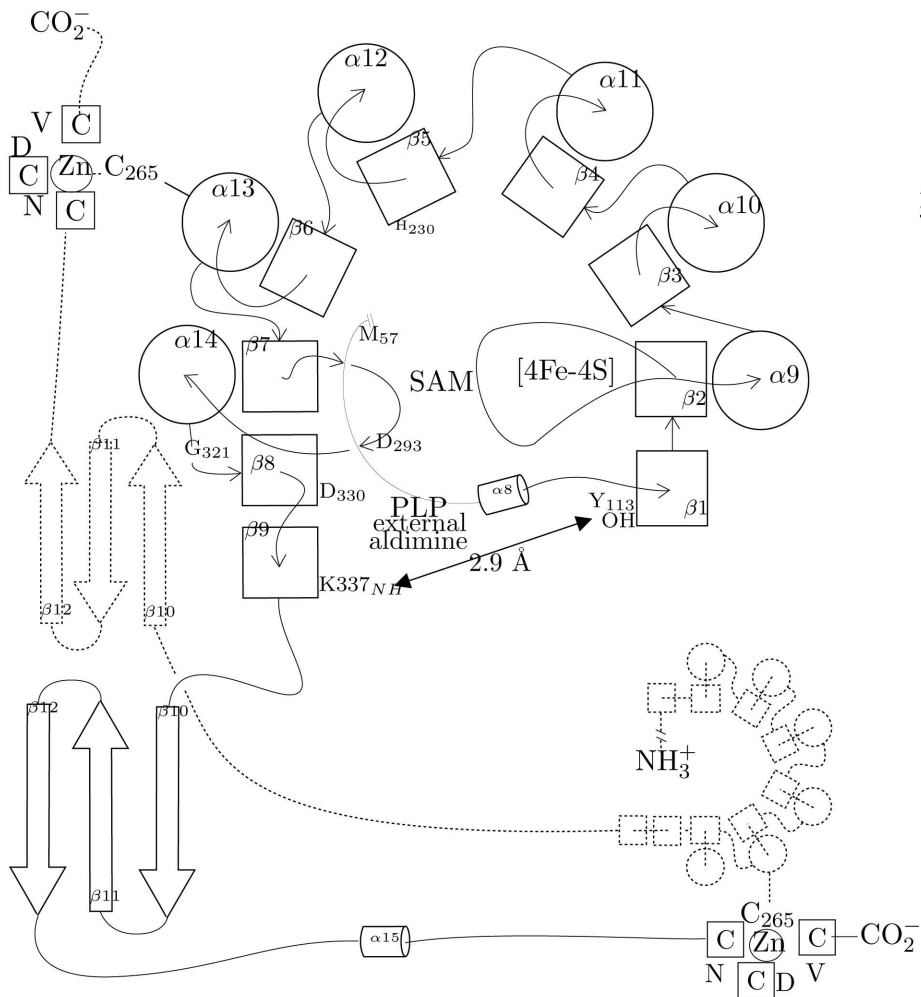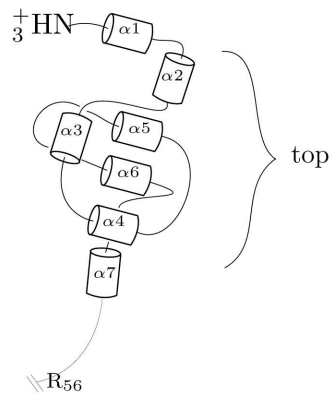

Supplement: pnas_0505726102_3.pdf [file pnas_0505726102_3.pdf]
